# Supplementary material for: Comparing Peak Burn Injury Times and Characteristics in Australia and New Zealand
Source: MDPI journal article supplement (doi:10.3390/ijerph19159578), 2022-08-04
Supplement: s1 [file s1]

## Supplementary Materials

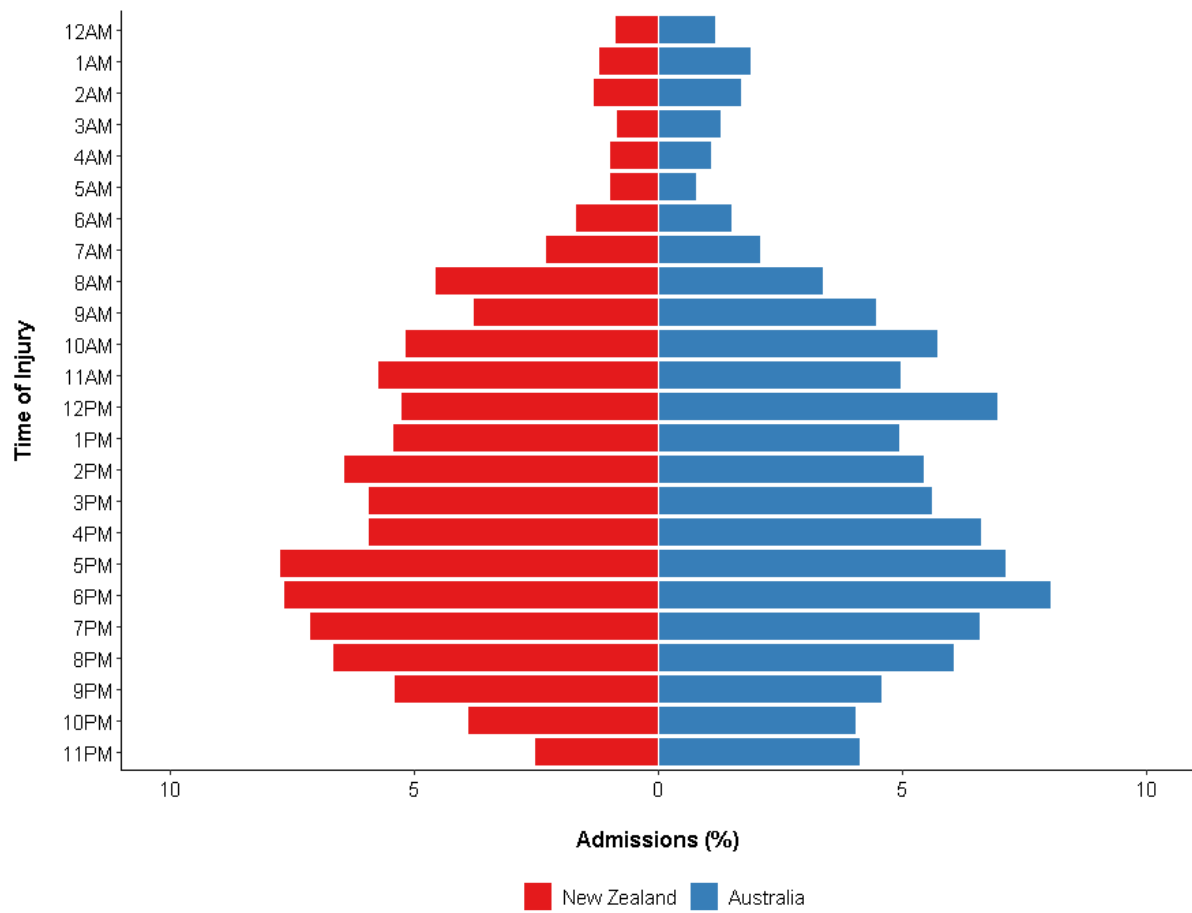

**Figure S1.** Case distribution by country and time of injury.

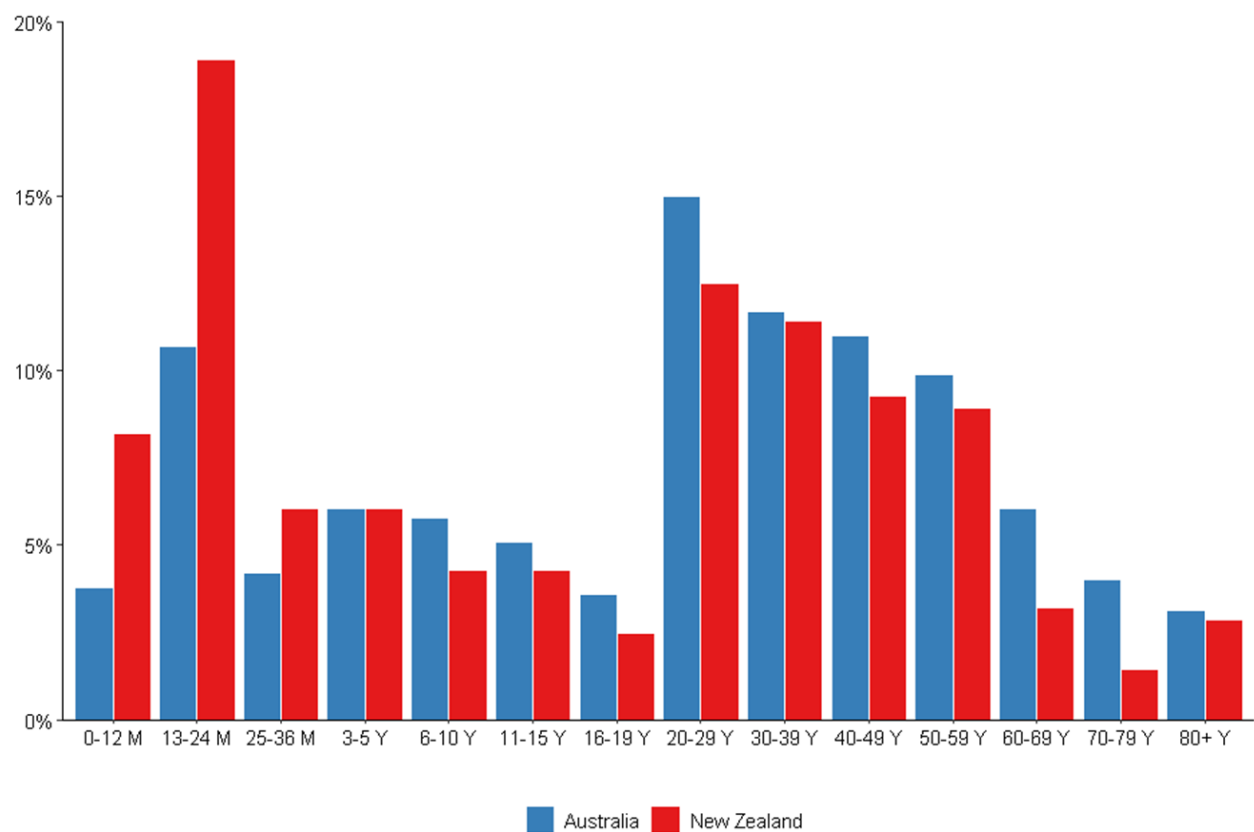

**Figure S2.** Age group distribution by age and country. M = Month; Y = Years.
